# Supplementary material
Source: Springer Nature journal article supplement (https://www.springermedizin.de/resource/supplementary/12889_2008_1437_MOESM4_ESM.pdf/9503866)

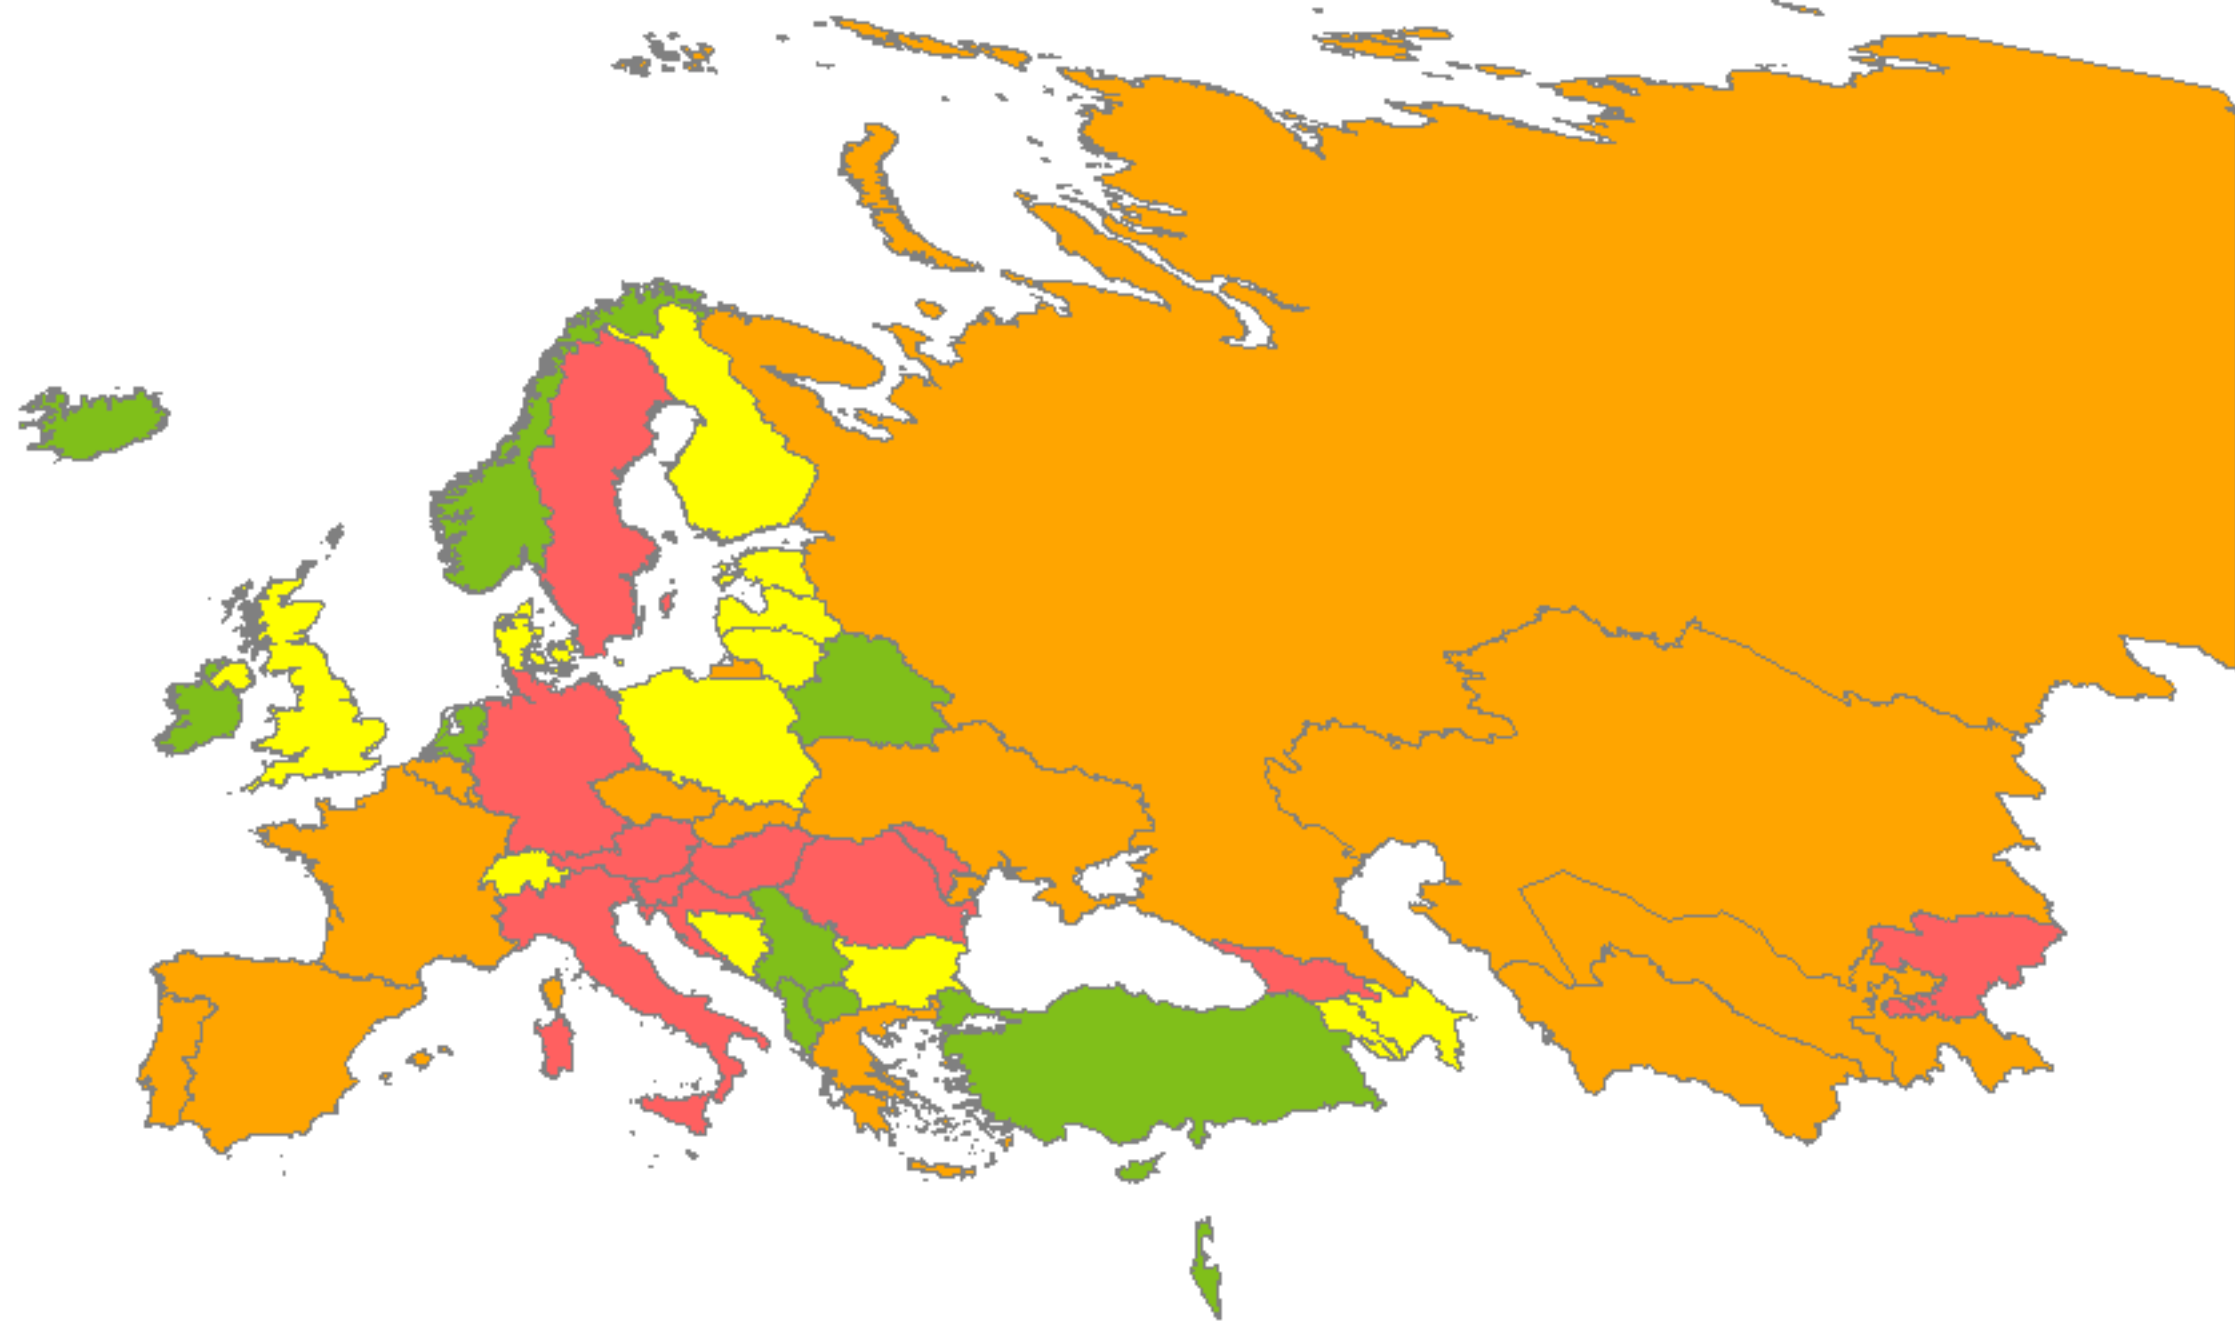

Death Rate

(Deaths per 100 000):

  $\leq 6$

 6 – 9

 9 – 12

  $> 12$

Supplement: MOESM4 [file 9503866]
